# Supplementary material for: Japanese GWAS identifies variants for bust-size, dysmenorrhea, and menstrual fever that are eQTLs for relevant protein-coding or long non-coding RNAs
Source: PubMed Central journal article supplement (PMC5981393; doi:10.1038/s41598-018-25065-9), 2018-05-31
Supplement: 41598_2018_25065_MOESM1_ESM.pdf [file 41598_2018_25065_MOESM1_ESM.pdf]

# Supplementary Information for:

Japanese GWAS identifies variants for bust-size, dysmenorrhea, and menstrual fever that are eQTLs for relevant protein-coding or long non-coding RNAs

**Tetsuya Hirata<sup>1,¶</sup>, Kaori Koga<sup>1,¶</sup>, Todd A. Johnson<sup>2,¶\*</sup>, Ryoko Morino<sup>3</sup>, Kazuyuki Nakazono<sup>2</sup>, Shigeo Kamitsuji<sup>2</sup>, Masanori Akita<sup>3</sup>, Maiko Kawajiri<sup>3</sup>, Azusa Kami<sup>3</sup>, Yuria Hoshi<sup>4</sup>, Asami Tada<sup>3</sup>, Kenichi Ishikawa<sup>3</sup>, Maaya Hine<sup>5</sup>, Miki Kobayashi<sup>5</sup>, Nami Kurume<sup>5</sup>, Tomoyuki Fujii<sup>1</sup>, Naoyuki Kamatani<sup>2</sup>, and Yutaka Osuga<sup>1,\*</sup>**

<sup>1</sup>Obstetrics and Gynecology, Graduate School of Medicine, The University of Tokyo, Bunkyo-ku, Tokyo, 113-8655, Japan

<sup>2</sup>EverGene Ltd., Shinjuku-ku, Tokyo, 163-1435, Japan

<sup>3</sup>StaGen Co., Ltd., Taito-ku, Tokyo, 111-0051, Japan

<sup>4</sup>Life Science Group, Healthcare Division, Department of Healthcare Business, MTI Ltd., Shinjuku-ku, Tokyo, 163-1435, Japan

<sup>5</sup>LunaLuna Division, Department of Healthcare Business, MTI Ltd., Shinjuku-ku, Tokyo, 163-1435, Japan

\* Corresponding authors:

E-mail: [todd.johnson@stagen.co.jp](mailto:todd.johnson@stagen.co.jp) (T.A.J.)

E-mail: [yutakaos-ty@umin.ac.jp](mailto:yutakaos-ty@umin.ac.jp) (Y.O.)

¶ These authors contributed equally to this work.

# Table of Contents

## Supplementary Tables 4

Table S1. Phenotype and case/control sample counts/demographic information 4

Table S2. Previous bust-size related associations 6

Table S3. Previous dysmenorrhea related associations 7

## Supplementary Datasets 8

General description of datasets 8

Common columns 8

Datasets for phenotypes with significant associations 8

Dataset S1. Bust size GWAS summary statistics 8

Dataset S2. Dysmenorrhea (pain severity) GWAS summary statistics 8

Dataset S3. Dysmenorrhea (QOL impact) GWAS summary statistics 8

Dataset S4. Menstrual pain medicine use GWAS summary statistics 8

Dataset S5. Menstrual fever GWAS summary statistics 8

Datasets for phenotypes with no significant associations 8

Dataset S6. Heavy vaginal discharge GWAS summary statistics 8

Dataset S7. Menstruation (QOL impact): acne GWAS summary statistics 8

Dataset S8. Menstruation (QOL impact): aggressiveness GWAS summary statistics 8

Dataset S9. Menstruation (QOL impact): increased appetite GWAS summary statistics 8

Dataset S10. Menstruation (QOL impact): bowel\_movement GWAS summary statistics 8

Dataset S11. Menstruation (QOL impact): depression GWAS summary statistics 8

Dataset S12. Menstruation (QOL impact): edema GWAS summary statistics 8

Dataset S13. Menstruation (QOL impact): headache GWAS summary statistics 8

Dataset S14. Menstruation (QOL impact): joint pain GWAS summary statistics 8

Dataset S15. Menstruation (QOL impact): loss of concentration GWAS summary statistics 8

Dataset S16. Menstrual (QOL impact): nervousness GWAS summary statistics 8

Dataset S17. Menstrual (QOL impact): pressure in the breast GWAS summary statistics 8

Dataset S18. Menstrual (QOL impact): sleepiness GWAS summary statistics 8

Dataset S19. Menstrual (QOL impact): stiff neck GWAS summary statistics 8

Dataset S20. Vaginal discharge: itching GWAS summary statistics 8

Dataset S21. Vaginal discharge: metrorrhagia GWAS summary statistics 8

Dataset S22. Vaginal discharge: smell GWAS summary statistics 8

## Supplementary Worksheet legends 9

Per-signal and per-SNP GWAS summary statistics 9

Worksheet S1. Summary of association signals for gynecology-related GWAS 9

Worksheet S2. Top SNPs associated with bust-size 9

Worksheet S3. Top SNPs associated with dysmenorrhea (pain severity) 9

Worksheet S4. Top SNPs associated with dysmenorrhea (QOL impact) 9

Worksheet S5. Top SNPs associated with use of pain medicine during menstruation 9

|                                                                                             |          |
|---------------------------------------------------------------------------------------------|----------|
| <b>Worksheet S6. Top SNPs associated with menstrual fever (QOL impact)</b>                  | <b>9</b> |
| <b>Per-signal and per-SNP colocalization summary statistics</b>                             | <b>9</b> |
| <b>Worksheet S7. Summary of colocalization analysis of GWAS and multi-tissue eQTL data</b>  | <b>9</b> |
| <b>Worksheet S8. Per-SNP results of ABF analysis of GWAS and multi-tissue eQTL data</b>     | <b>9</b> |
| <b>Worksheet S9. Summary of colocalization analysis of GWAS and single-tissue eQTL data</b> | <b>9</b> |
| <b>Worksheet S10. Per-SNP results of ABF analysis of GWAS and single-tissue eQTL data</b>   | <b>9</b> |

## **Supplementary Figures 10**

|                                                                                             |           |
|---------------------------------------------------------------------------------------------|-----------|
| <b>Quality-control and genome-wide analyses</b>                                             | <b>10</b> |
| <b>Figure S1. Population structure analysis</b>                                             | <b>10</b> |
| <b>Figure S2/page 1. Meta-analysis Manhattan plots for phenotypes with significant loci</b> | <b>11</b> |
| <b>Figure S2/page 2. Meta-analysis Manhattan plots for phenotypes with significant loci</b> | <b>12</b> |
| <b>Figure S3/page 1. QQ plots of genome-wide meta-analysis association statistics</b>       | <b>13</b> |
| <b>Figure S3/page 2. QQ plots of genome-wide meta-analysis association statistics</b>       | <b>14</b> |
| <b>Regional association and GWAS/eQTL colocalization plots</b>                              | <b>15</b> |
| <b>Common legends for regional association and GWAS/eQTL colocalization plots:</b>          | <b>15</b> |
| <b>Figure S4. Bust-size chr6:151.92-151.99 Mb (CCDC170) locus</b>                           | <b>16</b> |
| <b>Figure S5. Bust-size chr8:36.76-36.91 Mb (KCNU1/ZNF703) locus</b>                        | <b>17</b> |
| <b>Figure S6. Transformation of pain severity levels to 0-10 Numeric Rating Scale</b>       | <b>18</b> |
| <b>Figure S7. Dysmenorrhea (pain severity) chr1:115.80-115.83 Mb (NGF) locus</b>            | <b>19</b> |
| <b>Figure S8. Dysmenorrhea pain severity chr2:113.48-113.58Mb (IL1 gene cluster) locus</b>  | <b>20</b> |
| <b>Figure S9. Menstrual fever (QOL impact) chr6:154.33-154.46 Mb (OPRM1) locus</b>          | <b>21</b> |

# Supplementary Tables

**Table S1. Phenotype and case/control sample counts/demographic information**

Covariates: <sup>1</sup>PC1/PC2/Age, <sup>2</sup>PC1/PC2/BMI, <sup>3</sup>PC1/PC2/Age/BMI. Age and BMI are presented as mean (SD).

| Phenotype                                                           | Sample counts |      | Age         | BMI         |
|---------------------------------------------------------------------|---------------|------|-------------|-------------|
|                                                                     | LL01          | LL02 |             |             |
| <b>Bust size<sup>2</sup></b>                                        |               |      |             |             |
| AA                                                                  |               | 84   | 31.07(7.11) | 18.72(1.80) |
| A                                                                   |               | 354  | 33.43(7.17) | 19.76(2.55) |
| B                                                                   |               | 1041 | 32.22(7.09) | 20.44(2.91) |
| C                                                                   |               | 1470 | 32.33(6.72) | 21.10(3.15) |
| D                                                                   |               | 1239 | 32.20(6.56) | 21.95(3.46) |
| E                                                                   |               | 813  | 32.17(6.81) | 22.73(3.84) |
| F                                                                   |               | 405  | 32.31(6.70) | 23.76(4.41) |
| ≥G                                                                  |               | 203  | 32.43(6.53) | 26.21(6.28) |
| Total                                                               |               | 5609 |             |             |
| <b>Dysmenorrhea (pain severity)<sup>1</sup></b>                     |               |      |             |             |
| 0                                                                   | 232           | 245  | 34.73(7.04) | 21.52(3.35) |
| 1                                                                   | 764           | 674  | 34.25(6.68) | 21.69(3.71) |
| 2                                                                   | 168           | 151  | 34.61(7.01) | 22.20(4.01) |
| 5                                                                   | 2297          | 2183 | 32.88(6.62) | 21.84(3.84) |
| 10                                                                  | 2273          | 2361 | 31.30(6.44) | 21.72(3.83) |
| Total                                                               | 5734          | 5614 |             |             |
| <b>Menstrual (QOL impact): Dysmenorrhea<sup>1</sup></b>             |               |      |             |             |
| Controls                                                            | 2161          | 2034 | 34.06(6.75) | 21.85(3.74) |
| Cases                                                               | 3573          | 3580 | 31.64(6.48) | 21.72(3.84) |
| Total                                                               | 5734          | 5614 |             |             |
| <b>Pain medicine use during menstruation<sup>3</sup></b>            |               |      |             |             |
| Controls                                                            | 3921          | 4120 | 33.07(6.75) | 21.83(3.82) |
| Cases                                                               | 1813          | 1494 | 31.23(6.33) | 21.61(3.77) |
| Total                                                               | 5734          | 5614 |             |             |
| <b>Menstruation (QOL impact): fever<sup>1</sup></b>                 |               |      |             |             |
| Controls                                                            | 5622          | 5457 | 32.58(6.69) | 21.77(3.80) |
| Cases                                                               | 112           | 157  | 30.74(6.20) | 21.88(4.12) |
| Total                                                               | 5734          | 5614 |             |             |
| <b>Heavy vaginal discharge<sup>2</sup></b>                          |               |      |             |             |
| Controls                                                            | 5277          | 5143 | 32.50(6.70) | 21.82(3.83) |
| Cases                                                               | 457           | 471  | 32.86(6.49) | 21.22(3.47) |
| Total                                                               | 5734          | 5614 |             |             |
| <b>Menstruation (QOL impact): acne<sup>3</sup></b>                  |               |      |             |             |
| Controls                                                            | 4619          | 4410 | 33.21(6.70) | 21.91(3.90) |
| Cases                                                               | 1115          | 1204 | 29.92(5.98) | 21.23(3.35) |
| Total                                                               | 5734          | 5614 |             |             |
| <b>Menstruation (QOL impact): aggressiveness<sup>1</sup></b>        |               |      |             |             |
| Controls                                                            | 4835          | 4584 | 32.88(6.69) | 21.74(3.78) |
| Cases                                                               | 899           | 1030 | 30.86(6.40) | 21.90(3.94) |
| Total                                                               | 5734          | 5614 |             |             |
| <b>Menstruation (QOL impact): increased appetite<sup>3</sup></b>    |               |      |             |             |
| Controls                                                            | 4974          | 4711 | 32.85(6.66) | 21.67(3.79) |
| Cases                                                               | 760           | 903  | 30.67(6.52) | 22.34(3.83) |
| Total                                                               | 5734          | 5614 |             |             |
| <b>Menstruation (QOL impact): bowel_movement<sup>1</sup></b>        |               |      |             |             |
| Controls                                                            | 4831          | 4693 | 32.66(6.67) | 21.74(3.78) |
| Cases                                                               | 903           | 921  | 31.87(6.76) | 21.92(3.95) |
| Total                                                               | 5734          | 5614 |             |             |
| <b>Menstruation (QOL impact): depression<sup>1</sup></b>            |               |      |             |             |
| Controls                                                            | 3871          | 3609 | 33.20(6.63) | 21.76(3.84) |
| Cases                                                               | 1863          | 2005 | 31.25(6.60) | 21.78(3.75) |
| Total                                                               | 5734          | 5614 |             |             |
| <b>Menstruation (QOL impact): edema<sup>2</sup></b>                 |               |      |             |             |
| Controls                                                            | 4625          | 4283 | 32.56(6.70) | 21.70(3.80) |
| Cases                                                               | 1109          | 1331 | 32.42(6.66) | 22.02(3.83) |
| Total                                                               | 5734          | 5614 |             |             |
| <b>Menstruation (QOL impact): headache<sup>2</sup></b>              |               |      |             |             |
| Controls                                                            | 3976          | 3851 | 32.60(6.64) | 21.66(3.69) |
| Cases                                                               | 1758          | 1763 | 32.38(6.80) | 22.00(4.05) |
| Total                                                               | 5734          | 5614 |             |             |
| <b>Menstruation (QOL impact): joint pain<sup>3</sup></b>            |               |      |             |             |
| Controls                                                            | 5483          | 5337 | 32.59(6.69) | 21.75(3.80) |
| Cases                                                               | 251           | 277  | 31.43(6.54) | 22.13(3.93) |
| Total                                                               | 5734          | 5614 |             |             |
| <b>Menstruation (QOL impact): loss of concentration<sup>1</sup></b> |               |      |             |             |
| Controls                                                            | 4739          | 4533 | 32.79(6.64) | 21.77(3.80) |
| Cases                                                               | 995           | 1081 | 31.38(6.77) | 21.77(3.82) |
| Total                                                               | 5734          | 5614 |             |             |
| <b>Menstrual (QOL impact): nervousness<sup>3</sup></b>              |               |      |             |             |

|                                                                   |      |      |             |             |
|-------------------------------------------------------------------|------|------|-------------|-------------|
| Controls                                                          | 3830 | 3597 | 33.14(6.71) | 21.66(3.72) |
| Cases                                                             | 1904 | 2017 | 31.39(6.50) | 21.98(3.96) |
| Total                                                             | 5734 | 5614 |             |             |
| <b>Menstrual (QOL impact): pressure in the breast<sup>3</sup></b> |      |      |             |             |
| Controls                                                          | 5092 | 4947 | 32.68(6.67) | 21.71(3.78) |
| Cases                                                             | 642  | 667  | 31.41(6.71) | 22.22(3.97) |
| Total                                                             | 5734 | 5614 |             |             |
| <b>Menstrual (QOL impact): sleepiness<sup>1</sup></b>             |      |      |             |             |
| Controls                                                          | 3832 | 3680 | 32.84(6.67) | 21.73(3.80) |
| Cases                                                             | 1902 | 1934 | 31.94(6.69) | 21.85(3.82) |
| Total                                                             | 5734 | 5614 |             |             |
| <b>Menstrual (QOL impact): stiff neck<sup>2</sup></b>             |      |      |             |             |
| Controls                                                          | 4797 | 4670 | 32.50(6.68) | 21.71(3.77) |
| Cases                                                             | 937  | 944  | 32.69(6.71) | 22.08(3.98) |
| Total                                                             | 5734 | 5614 |             |             |
| <b>Vaginal discharge: itching<sup>1</sup></b>                     |      |      |             |             |
| Controls                                                          | 5058 | 4945 | 32.41(6.71) | 21.78(3.83) |
| Cases                                                             | 676  | 669  | 33.49(6.43) | 21.66(3.60) |
| Total                                                             | 5734 | 5614 |             |             |
| <b>Vaginal discharge: metrorrhagia<sup>3</sup></b>                |      |      |             |             |
| Controls                                                          | 5328 | 5312 | 32.47(6.70) | 21.79(3.82) |
| Cases                                                             | 406  | 302  | 33.48(6.36) | 21.42(3.54) |
| Total                                                             | 5734 | 5614 |             |             |
| <b>Vaginal discharge: smell<sup>1</sup></b>                       |      |      |             |             |
| Controls                                                          | 5367 | 5222 | 32.50(6.72) | 21.78(3.83) |
| Cases                                                             | 367  | 392  | 33.02(6.23) | 21.55(3.54) |
| Total                                                             | 5734 | 5614 |             |             |

**Table S2. Previous bust-size related associations**

We summarize results from the current study for previously reported bust-size related associations (Breast-size or Mammographic density) from the NHGRI/EBI GWAS Catalog (downloaded 8/31/2017). Current study results were from the genome-wide summary statistics based imputation for reported loci that previously achieved  $P < 5 \times 10^{-8}$ . Ordered by FDR in current study.

| Phenotype               | Author(s)                            | Top rsids                                    | Genes                        | Chr | Start pos. | End pos.  | Allele frequency |       | GWAS P-value |          | Study FDR |
|-------------------------|--------------------------------------|----------------------------------------------|------------------------------|-----|------------|-----------|------------------|-------|--------------|----------|-----------|
|                         |                                      |                                              |                              |     |            |           | EUR              | EAS   | Previous     | Current  |           |
| Breast size, M. density | Eriksson N, Lindstrom S, Pickrell JK | rs12173570, rs12665607, rs9397437            | C6orf97, CCDC170, ESR1       | 6   | 151946629  | 151957714 | 0.101            | 0.332 | 1.00E-11     | 2.02E-14 | 2.43E-13  |
| Breast size, M. density | Eriksson N, Lindstrom S, Pickrell JK | rs7816345, rs10110651                        | KCNU1, MRPS7P1, ZNF703       | 8   | 36846109   | 36847115  | 0.148            | 0.311 | 7.00E-31     | 1.14E-08 | 6.84E-08  |
| M. density, Breast size | Lindstrom S, Pickrell JK             | rs17001868, rs5995875                        | MKL1, SGSM3, TNRC6B          | 22  | 40778231   | 40960692  | 0.119            | 0.245 | 2.00E-13     | 7.06E-07 | 7.06E-06  |
| M. density              | Lindstrom S                          | rs10034692                                   | AREG                         | 4   | 75419787   | 75419787  | 0.282            | 0.31  | 2.00E-10     | 1.98E-03 | 7.92E-03  |
| Breast size             | Pickrell JK                          | rs17356907                                   | NTN4, USP44                  | 12  | 96027759   | 96027759  | 0.293            | 0.264 | 1.00E-13     | 5.13E-03 | 0.0313    |
| M. density, Breast size | Lindstrom S, Pickrell JK             | rs12642133, rs7659874                        | AREG, BTC                    | 4   | 75543289   | 75547013  | 0.316            | 0.471 | 9.00E-13     | 0.0104   | 0.0508    |
| Breast size, M. density | Eriksson N, Lindstrom S, Pickrell JK | rs7089814, rs10995190, rs10509168, rs3081227 | ADO, ALDH7A1P4, ZNF365       | 10  | 64178657   | 64278682  | 0.65             | 0.848 | 1.00E-16     | 0.0288   | 0.1309    |
| Breast size             | Eriksson N, Pickrell JK              | rs12371778, rs1838564                        | CCDC91, PTHLH                | 12  | 28154895   | 28156081  | 0.102            | 0.177 | 1.00E-12     | 0.0326   | 0.1319    |
| M. density              | Lindstrom S                          | rs703556                                     | IGF1                         | 12  | 103011894  | 103011894 | 0.032            | 0.107 | 4.00E-10     | 0.0584   | 0.1403    |
| Breast size             | Eriksson N, Pickrell JK              | rs4849887, rs17625845                        | GLI2, INHBB, LINC01101, RALB | 2   | 121089731  | 121245122 | 0.898            | 0.791 | 6.00E-18     | 0.0748   | 0.2078    |
| Breast size             | Pickrell JK                          | rs2359714                                    | SPAG17, TBX15                | 1   | 118770271  | 118770271 | 0.488            | 0.189 | 4.00E-09     | 0.1499   | 0.3569    |
| Breast size             | Pickrell JK                          | rs34091558                                   | LMOD1                        | 1   | 201886769  | 201886769 | 0.305            | 0.107 | 3.00E-08     | 0.2056   | 0.447     |
| M. density              | Lindstrom S                          | rs186749                                     | PRDM6                        | 5   | 122454305  | 122454305 | 0.669            | 0.53  | 3.00E-09     | 0.4257   | 0.5228    |
| M. density              | Stevens KN                           | rs1265507                                    | TBX3, TBX5                   | 12  | 114868138  | 114868138 | 0.521            | 0.23  | 1.00E-08     | 0.4001   | 0.5228    |
| M. density              | Lindstrom S                          | rs7289126                                    | PLA2G6, TMEM184B             | 22  | 38628306   | 38628306  | 0.467            | 0.476 | 5.00E-09     | 0.4482   | 0.5228    |
| Breast size             | Pickrell JK                          | rs7102705                                    | CCND1, MYEOV                 | 11  | 69143284   | 69143284  | 0.781            | 0.674 | 1.00E-09     | 0.7838   | 0.8595    |
| Breast size             | Pickrell JK                          | rs62105303                                   | FAM150B, TMEM18              | 2   | 632922     | 632922    | 0.83             | 0.914 | 3.00E-08     | 0.8806   | 0.8816    |
| M. density              | Lindstrom S                          | rs3817198                                    | LSP1, TNNT3                  | 11  | 1909006    | 1909006   | 0.314            | 0.103 | 1.00E-10     | 0.8965   | 0.9635    |

**Table S3. Previous dysmenorrhea related associations**

We summarize results from the current study for previous dysmenorrhea-related associations (dysmenorrhea or endometriosis) from the NHGRI/EBI GWAS Catalog (downloaded 8/31/2017). Current study results were from the genome-wide summary statistics based imputation for reported loci that previously achieved  $P < 5 \times 10^{-8}$ . Ordered by FDR in current study.

| Phenotype     | Author(s)                                  | Top rsids                        | Genes                           | Chr | Start pos. | End pos.  | Allele frequency |       | GWAS P-value |          | Study FDR |
|---------------|--------------------------------------------|----------------------------------|---------------------------------|-----|------------|-----------|------------------|-------|--------------|----------|-----------|
|               |                                            |                                  |                                 |     |            |           | EUR              | EAS   | Previous     | Current  |           |
| Dysmenorrhea  | Jones AV, Li Z                             | rs7523086, rs7523831             | NGF, RP4-663N10.1, TSPAN2       | 1   | 115823387  | 115824192 | 0.360            | 0.503 | 4.00E-14     | 1.65E-15 | 5.47E-15  |
| Endometriosis | Sapkota Y                                  | rs10167914                       | IL1A                            | 2   | 113563361  | 113563361 | 0.325            | 0.705 | 1.00E-09     | 1.60E-15 | 3.51E-14  |
| Endometriosis | Sapkota Y                                  | rs1971256                        | CCDC170                         | 6   | 151816011  | 151816011 | 0.213            | 0.368 | 4.00E-08     | 1.93E-03 | 0.0255    |
| Endometriosis | Nyholt DR, Sapkota Y                       | rs7739264, rs760794              | ID4                             | 6   | 19785588   | 19790560  | 0.530            | 0.746 | 2.00E-10     | 0.0039   | 0.0425    |
| Endometriosis | Sapkota Y                                  | rs71575922                       | SYNE1                           | 6   | 152554014  | 152554014 | 0.155            | 0.001 | 2.00E-08     | 0.0363   | 0.1845    |
| Endometriosis | Nyholt DR, Sapkota Y                       | rs13394619, rs11674184           | GREB1                           | 2   | 11660955   | 11727507  | 0.528            | 0.488 | 3.00E-17     | 0.1244   | 0.5130    |
| Endometriosis | Nyholt DR, Sapkota Y, Uno S                | rs1537377, rs10965235            | ARF, CDKN2A, CDKN2B, CDKN2B-AS1 | 9   | 22115105   | 22169700  | 0.380            | 0.318 | 6.00E-12     | 0.1729   | 0.5706    |
| Endometriosis | Sapkota Y                                  | rs6546324                        | ETAA1                           | 2   | 67856490   | 67856490  | 0.689            | 0.884 | 3.00E-08     | 0.2482   | 0.6757    |
| Endometriosis | Albertsen HM, Nyholt DR, Sapkota Y         | rs2235529, rs7521902, rs12037376 | WNT4, ZBTB40                    | 1   | 22450487   | 22490724  | 0.206            | 0.510 | 9.00E-17     | 0.2992   | 0.7052    |
| Dysmenorrhea  | Li Z                                       | rs76518691                       | ZMIZ1                           | 10  | 80918767   | 80918767  | 0.000            | 0.094 | 1.47E-09     | 0.8335   | 0.8335    |
| Endometriosis | Sapkota Y                                  | rs1903068                        | KDR                             | 4   | 56008477   | 56008477  | 0.306            | 0.191 | 1.00E-11     | 0.6415   | 0.9290    |
| Endometriosis | Nyholt DR, Painter JN, Sapkota Y, Uimari O | rs12700667                       | NFE2L3                          | 7   | 25901639   | 25901639  | 0.723            | 0.185 | 9.00E-10     | 0.8080   | 0.9290    |
| Endometriosis | Nyholt DR, Sapkota Y                       | rs10859871, rs4762326            | VEZT                            | 12  | 95668951   | 95711876  | 0.443            | 0.427 | 5.00E-13     | 0.6071   | 0.9290    |
| Endometriosis | Wang W                                     | rs4966038                        | IGF1R                           | 15  | 99446632   | 99446632  | 0.349            | 0.446 | 2.00E-09     | 0.6190   | 0.9290    |
| Endometriosis | Sapkota Y                                  | rs74485684                       | FSHB                            | 11  | 30242287   | 30242287  | 0.161            | 0.032 | 2.00E-08     | 0.9588   | 0.9833    |
| Endometriosis | Uimari O                                   | rs1250258                        | FNI                             | 2   | 216300185  | 216300185 | 0.766            | 0.925 | 3.00E-08     | 0.6810   | 0.9975    |

# Supplementary Datasets

## General description of datasets

Tabbed text files of GWAS summary statistics for genome-wide genotyped SNPs plus imputed variants in region around association signals.

### Common columns

regional.analysis: Status flag with 0 if SNP data comes from GWAS micro-array data or 1 if SNP lies in imputed region.

CHR: Chromosomes numbered 1-23 for autosomes and chrX.

BP: Basepair position in hg19 coordinates

rsid: dbSNP147 rsID or concatenated ID with chrNN:BP.A2.A1

A1: Effect-allele and non-reference (alternate/ALT) allele in hg19

A2: hg19 reference/REF allele

A1.AF: Mean frequency of A1 allele across LL01 and LL02 study stages

P: Unconditioned P-value from linear (bust-size and dysmenorrhea) or logistic (menstrual fever) regression

BETA: Unconditioned beta-coefficient from linear (bust-size and dysmenorrhea) or logistic (menstrual fever) regression

SE: Unconditioned beta-coefficient standard error (SE) from linear (bust-size and dysmenorrhea) or logistic (menstrual fever) regression

### Datasets for phenotypes with significant associations

**Dataset S1. Bust size GWAS summary statistics**

**Dataset S2. Dysmenorrhea (pain severity) GWAS summary statistics**

**Dataset S3. Dysmenorrhea (QOL impact) GWAS summary statistics**

**Dataset S4. Menstrual pain medicine use GWAS summary statistics**

**Dataset S5. Menstrual fever GWAS summary statistics**

### Datasets for phenotypes with no significant associations

**Dataset S6. Heavy vaginal discharge GWAS summary statistics**

**Dataset S7. Menstruation (QOL impact): acne GWAS summary statistics**

**Dataset S8. Menstruation (QOL impact): aggressiveness GWAS summary statistics**

**Dataset S9. Menstruation (QOL impact): increased appetite GWAS summary statistics**

**Dataset S10. Menstruation (QOL impact): bowel\_movement GWAS summary statistics**

**Dataset S11. Menstruation (QOL impact): depression GWAS summary statistics**

**Dataset S12. Menstruation (QOL impact): edema GWAS summary statistics**

**Dataset S13. Menstruation (QOL impact): headache GWAS summary statistics**

**Dataset S14. Menstruation (QOL impact): joint pain GWAS summary statistics**

**Dataset S15. Menstruation (QOL impact): loss of concentration GWAS summary statistics**

**Dataset S16. Menstrual (QOL impact): nervousness GWAS summary statistics**

**Dataset S17. Menstrual (QOL impact): pressure in the breast GWAS summary statistics**

**Dataset S18. Menstrual (QOL impact): sleepiness GWAS summary statistics**

**Dataset S19. Menstrual (QOL impact): stiff neck GWAS summary statistics**

**Dataset S20. Vaginal discharge: itching GWAS summary statistics**

**Dataset S21. Vaginal discharge: metrorrhagia GWAS summary statistics**

**Dataset S22. Vaginal discharge: smell GWAS summary statistics**



# Supplementary Worksheet legends

## Per-signal and per-SNP GWAS summary statistics

First two worksheets in file contain Legends with descriptions of individual columns.

### **Worksheet S1. Summary of association signals for gynecology-related GWAS**

#### **Worksheet S2. Top SNPs associated with bust-size**

Descriptive information, statistics, and annotation of SNPs in moderate-high LD ( $r^2 > 0.5$  |  $r^2_{equiv} > 0.5$ ) to top SNP in each association signal for bust-size.

#### **Worksheet S3. Top SNPs associated with dysmenorrhea (pain severity)**

Descriptive information, statistics, and annotation of SNPs in moderate-high LD ( $r^2 > 0.5$  |  $r^2_{equiv} > 0.5$ ) to top SNP in each association signal for dysmenorrhea (menstrual cramping).

#### **Worksheet S4. Top SNPs associated with dysmenorrhea (QOL impact)**

Descriptive information, statistics, and annotation of SNPs in moderate-high LD ( $r^2 > 0.5$  |  $r^2_{equiv} > 0.5$ ) to top SNP in each association signal for dysmenorrhea (QOL impact).

#### **Worksheet S5. Top SNPs associated with use of pain medicine during menstruation**

Descriptive information, statistics, and annotation of SNPs in moderate-high LD ( $r^2 > 0.5$  |  $r^2_{equiv} > 0.5$ ) to top SNP in each association signal for use of pain medicine during menstruation.

#### **Worksheet S6. Top SNPs associated with menstrual fever (QOL impact)**

Descriptive information, statistics, and annotation of SNPs in moderate-high LD ( $r^2 > 0.5$  |  $r^2_{equiv} > 0.5$ ) to top SNP in each association signal for menstrual fever (QOL impact) during menstruation.

## Per-signal and per-SNP colocalization summary statistics

### **Worksheet S7. Summary of colocalization analysis of GWAS and multi-tissue eQTL data**

Per-signal summary of colocalization analyses for GWAS/multi-tissue eQTL signal pairs that had: 1) at least one SNP in common that was moderate-highly associated in both GWAS and eQTL datasets ( $r^2_{equiv} > 0.7$  &  $RSS > 0.7$ ), and 2) nominally supported for colocalization by ABF or SMR tests ( $PP_{H4\ ABF} > 0.3$  |  $P_{SMR} < 0.05$ )

#### **Worksheet S8. Per-SNP results of ABF analysis of GWAS and multi-tissue eQTL data**

Per-SNP output for signals in Worksheet S7. Filtered for SNPs that were moderately associated in either GWAS or eQTL signal ( $r^2_{equiv} > 0.5$  | ( $r^2_{eQTL} > 0.2$  &  $RSS_{eQTL} > 0.5$ )).

### **Worksheet S9. Summary of colocalization analysis of GWAS and single-tissue eQTL data**

Per-signal summary of colocalization analyses for GWAS/single-tissue eQTL signal pairs that had: 1) at least one SNP in common that was moderate-highly associated in both GWAS and eQTL datasets ( $r^2_{equiv} > 0.7$  &  $RSS > 0.7$ ), and 2) nominally supported for colocalization by ABF or SMR tests ( $PP_{H4\ ABF} > 0.3$  |  $P_{SMR} < 0.05$ )

#### **Worksheet S10. Per-SNP results of ABF analysis of GWAS and single-tissue eQTL data**

Per-SNP output for signals in Worksheet S9. Filtered for SNPs that were moderately associated in either GWAS or eQTL signal ( $r^2_{equiv} > 0.5$  | ( $r^2_{eQTL} > 0.2$  &  $RSS_{eQTL} > 0.5$ )).

## Supplementary Figures

### Quality-control and genome-wide analyses

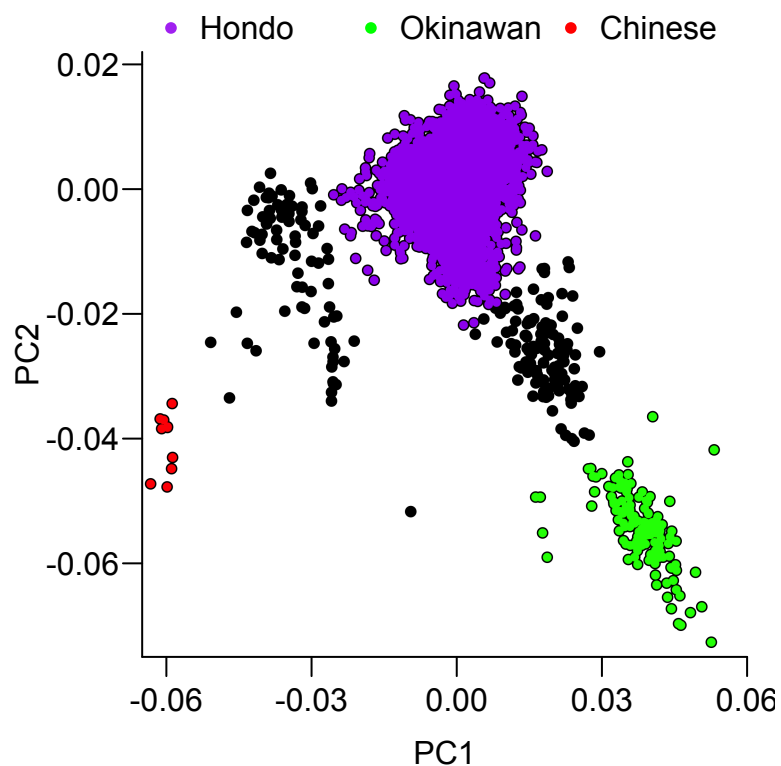

#### Figure S1. Population structure analysis

PC1 and PC2 from PCA of East Asian samples after removal of outliers. Around the main Hondo population cluster, the extremes of local East Asian population structure are denoted by the Okinawan and Chinese (based on overlap with 1000G CHB samples) clusters. The “Hondo” cluster has been shown to generally represent individuals residing on the main Japanese islands (Kyushu, Honshu, Hokkaido, Shikoku).

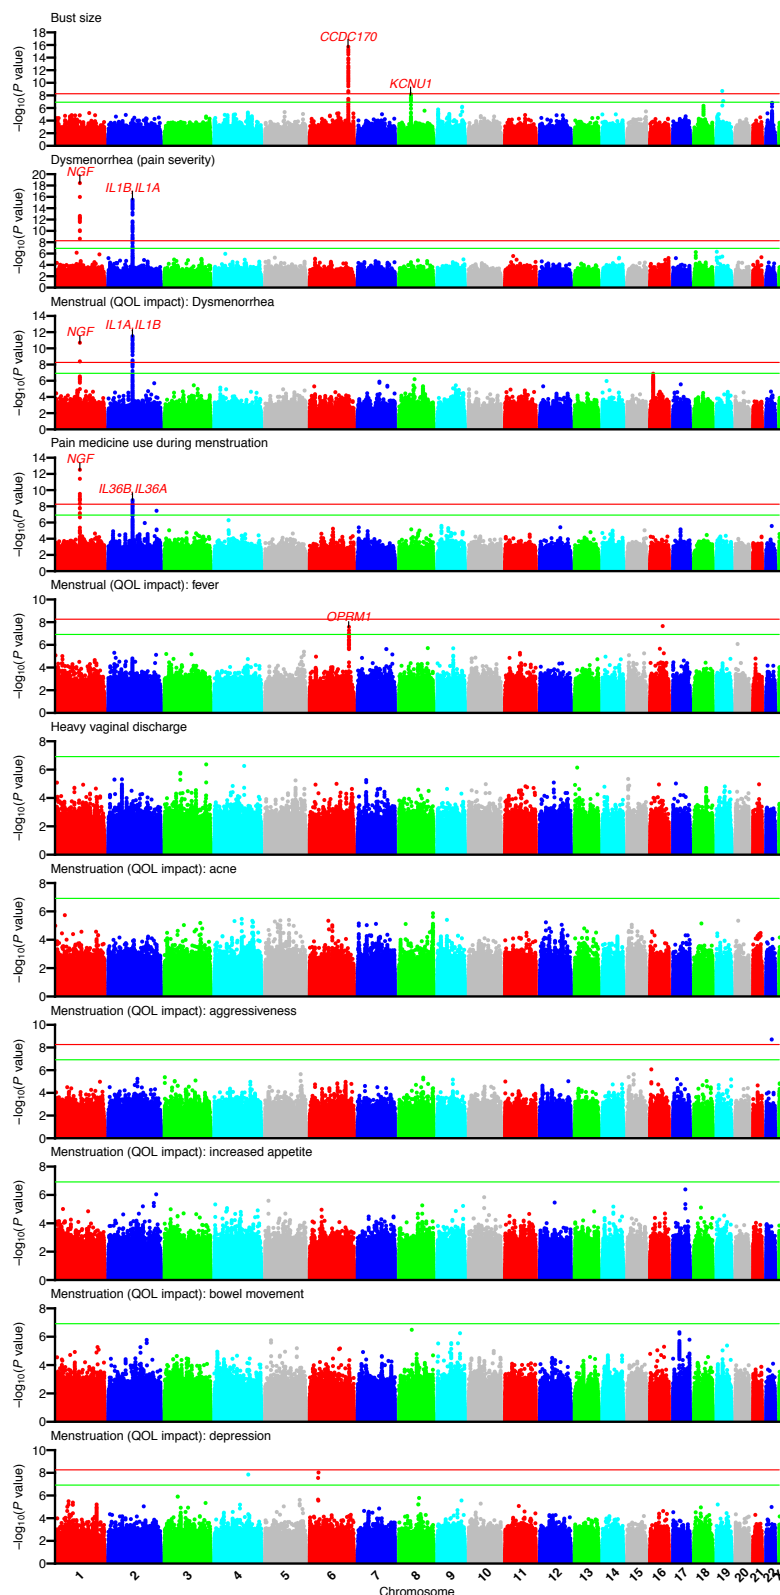

**Figure S2/page 1. Meta-analysis Manhattan plots for phenotypes with significant loci**

Manhattan plots of  $-\log_{10}(P \text{ value})$  statistics from DISTMIX summary statistics based imputation (using 1000 Genomes Phase 3) of gynecology-related phenotype GWAS analyses. Top association signals were labeled with up to two annotated genes from Supplementary Worksheet S1 for variants with  $r^2 > 0.8$  to the top SNP. Peaks with more than two genes overlap more than one independent association signal. Green line denotes the nominal significance cutoff ( $1.21 \times 10^{-7}$ ) and the red line significance after adjustment for multiple testing of 22 phenotypes ( $P < 5.5 \times 10^{-9}$ ).

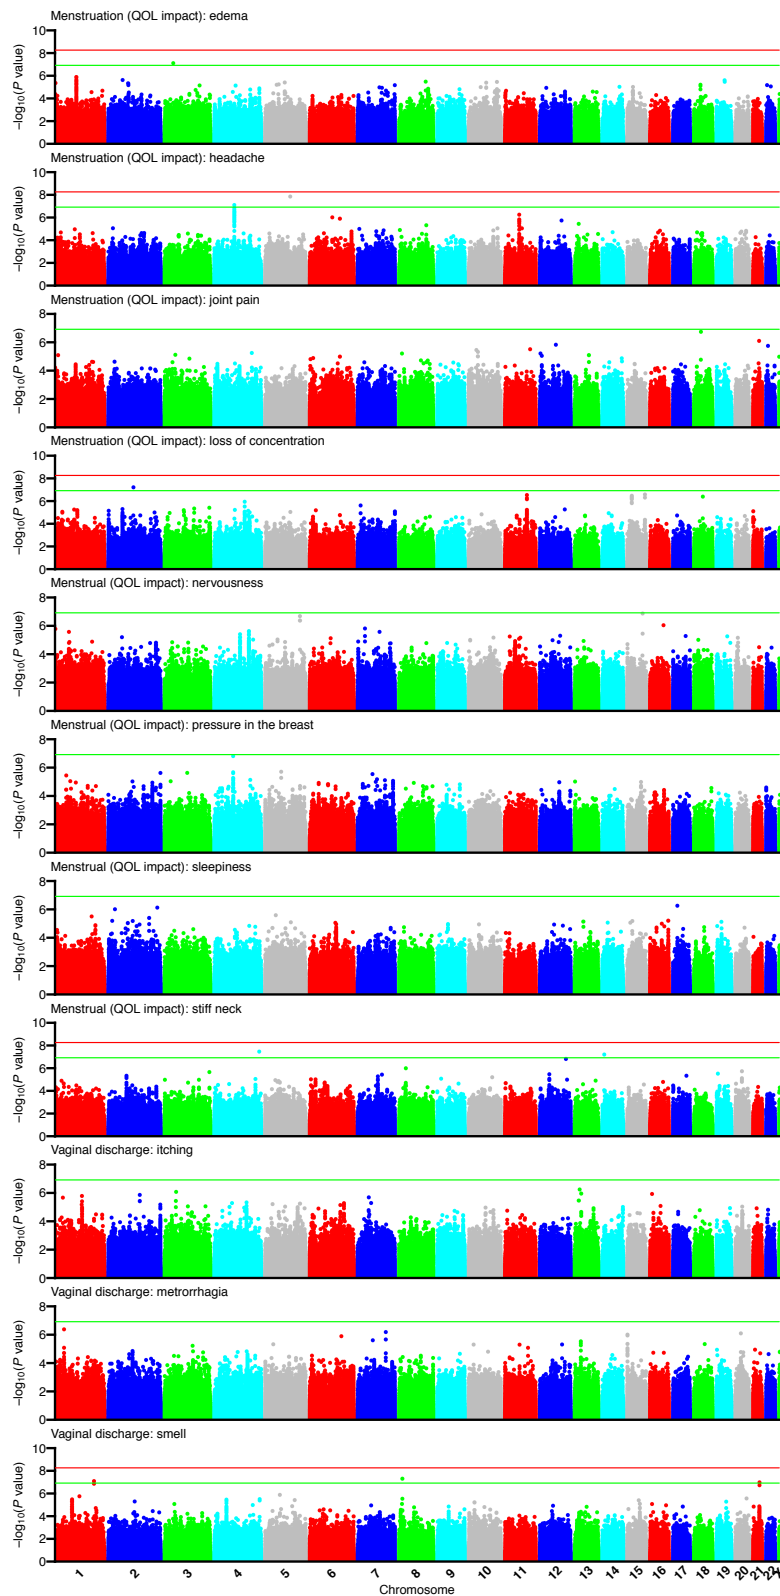

**Figure S2/page 2. Meta-analysis Manhattan plots for phenotypes with significant loci**

Manhattan plots of  $-\log_{10}(P \text{ value})$  statistics from DISTMIX summary statistics based imputation (using 1000 Genomes Phase 3) of gynecology-related phenotype GWAS analyses. Top association signals were labeled with up to two annotated genes from Supplementary Worksheet S1 for variants with  $r^2 > 0.8$  to the top SNP. Peaks with more than two genes overlap more than one independent association signal. Green line denotes the nominal significance cutoff ( $1.21 \times 10^{-7}$ ) and the red line significance after adjustment for multiple testing of 22 phenotypes ( $P < 5.5 \times 10^{-9}$ ).

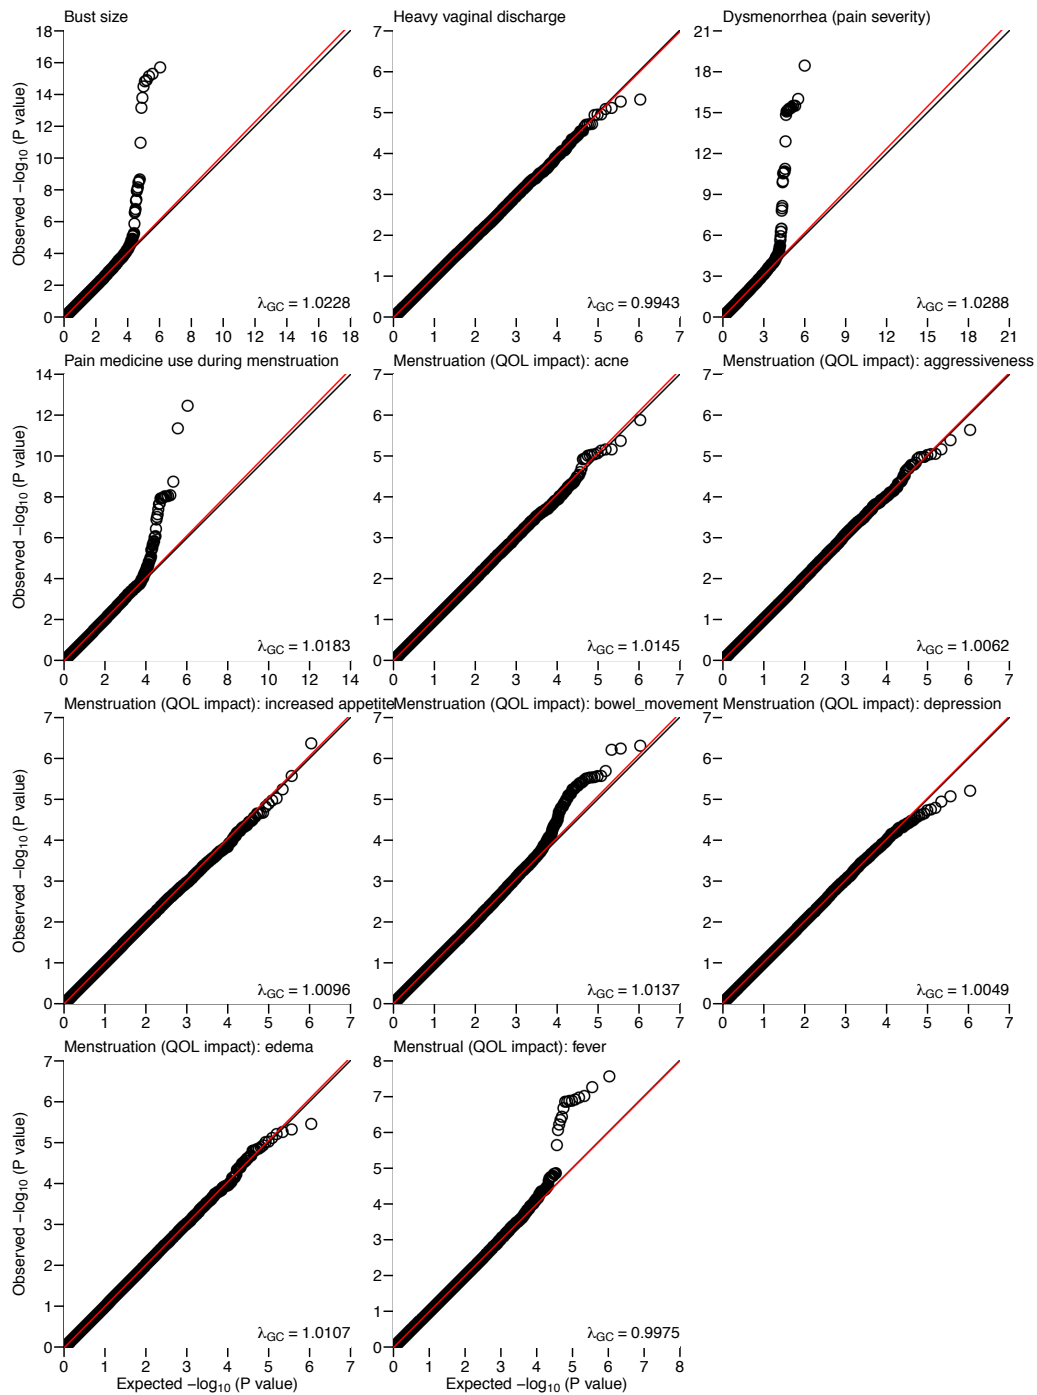

**Figure S3/page 1. QQ plots of genome-wide meta-analysis association statistics**

QQ plot of expected and observed  $-\log_{10}(P \text{ value})$  for genotyped GWAS statistics for 11/22 skin phenotypes. We calculated  $\lambda_{GC}$  from the median observed  $\chi^2$  test statistics divided by the median of test statistics assuming a uniform distribution. Black line has slope of 1.0. Red line has slope of  $\lambda_{GC}$ .

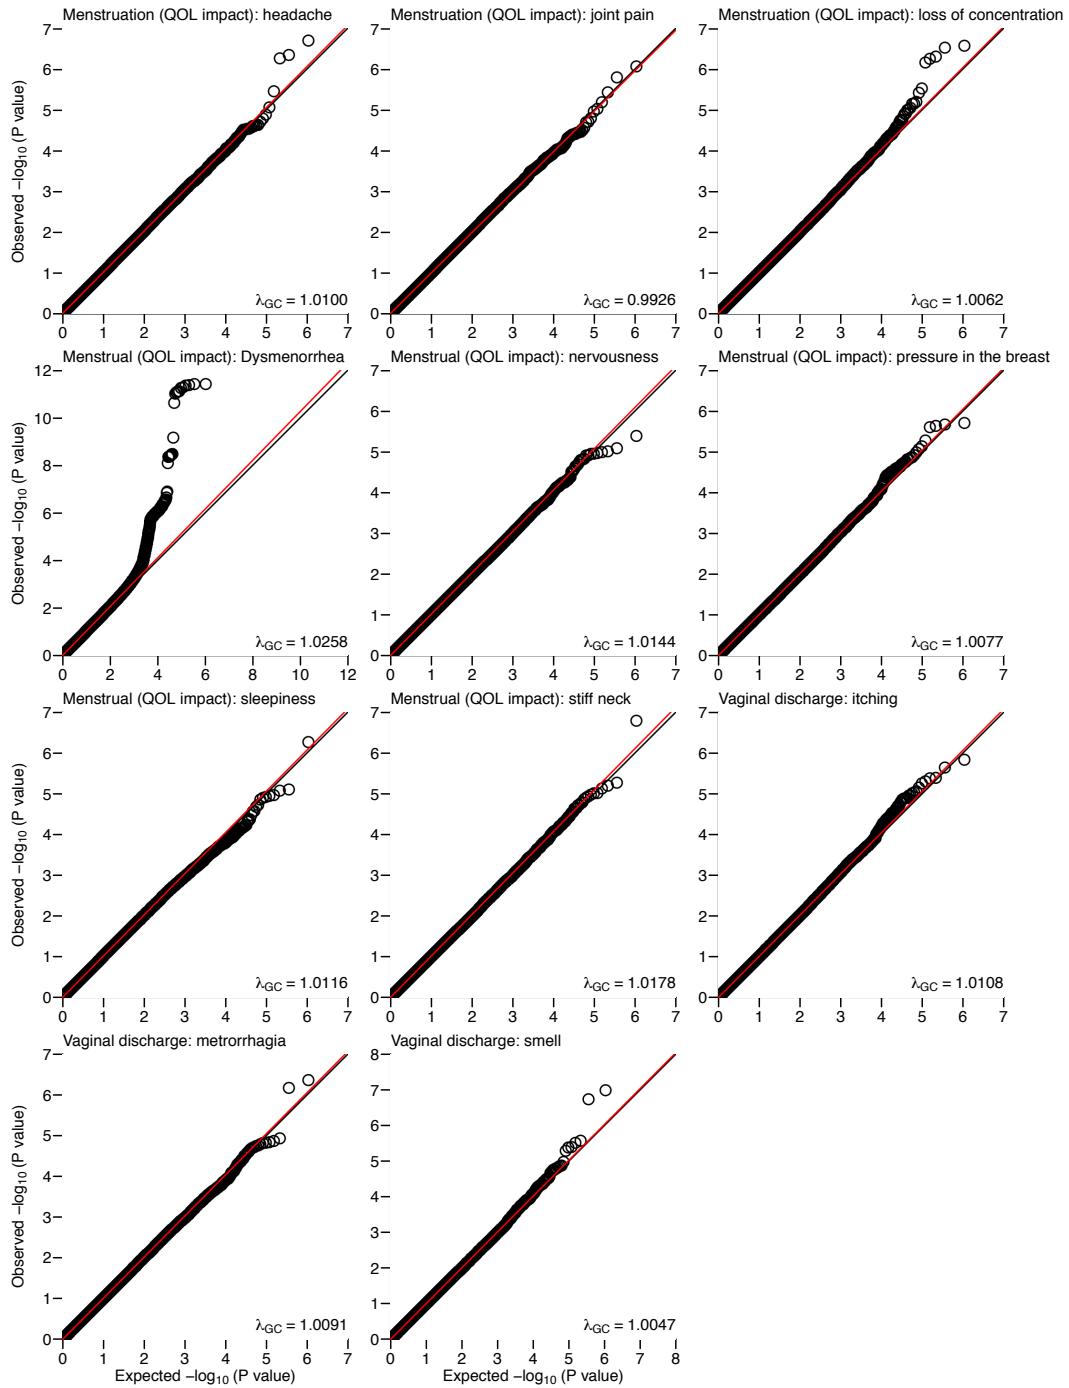

**Figure S3/page 2. QQ plots of genome-wide meta-analysis association statistics**

QQ plot of expected and observed  $-\log_{10}$  (P value) for genotyped GWAS statistics for 11/22 skin phenotypes. We calculated  $\lambda_{GC}$  from the median observed  $\chi^2$  test statistics divided by the median of test statistics assuming a uniform distribution. Black line has slope of 1.0. Red line has slope of  $\lambda_{GC}$ .

## Regional association and GWAS/eQTL colocalization plots

### Common legends for regional association and GWAS/eQTL colocalization plots:

Panels (a): Plot of  $-\log_{10}(\text{P-values})$  around association signal. Upper sub-panel displays points sized by LD  $r^2$  to the top SNP. Lower panel shows  $-\log_{10}(\text{P-values})$  with (red circles) and without (black circles) conditioning on the top SNP. The top SNP in each panel is plotted as a purple upright triangle. Next labelled panels show analyses of GTExPortal single-tissue and multi-tissue eQTL data. Each single- or multi-tissue eQTL analysis was processed to identify putative independent signals based on pairwise EUR and AFR LD  $r^2$ . SNPs in each sub-panel were then coloured by signal assignment and rank of the top SNPs (1<sup>st</sup> ranked=green, 2<sup>nd</sup>=orange, 3<sup>rd</sup>=purple, 4<sup>th</sup>=magenta) and sized by LD  $r^2$  to each signal's top SNP. Inset left-side table shows GWAS/eQTL colocalization statistics: the posterior probability (PP) from Approximate Bayes Factor (H4 ABF) and P-values from the Summary data-based Mendelian Randomization (SMR) and heterogeneity in dependent instruments (HEIDI) tests.  $PP_{H4\ ABF}>0.3$  and  $PP_{H4\ ABF}>0.5$  were considered as nominal and moderate support of colocalization, while  $PP_{H4\ ABF}>0.9$  was considered as strong support of colocalization/pleiotropy. We considered  $P_{SMR}<0.05$  as supporting linkage/colocalization and with  $P_{HEIDI}\geq 0.05$  as supporting pleiotropy between GWAS and eQTL signals. The Supplementary Figures show plots for any single-tissue or multi-tissue analysis that possessed at least nominal support for colocalization from either ABF or SMR tests ( $PP_{H4\ ABF}>0.3 \mid P_{SMR}<0.05$ ). Coordinates and strand of genes from GENCODE V27 (bld. 37 liftover) are plotted below the multi-tissue sub-panel. The target eQTL gene is highlighted in red. The bottom-most labelled panel of each figure shows and RoadMap Epigenomics epilogos plot for the 25-state imputed epigenetics segments, high LD or candidate causal variants, chrom. band, and gene transcript models.

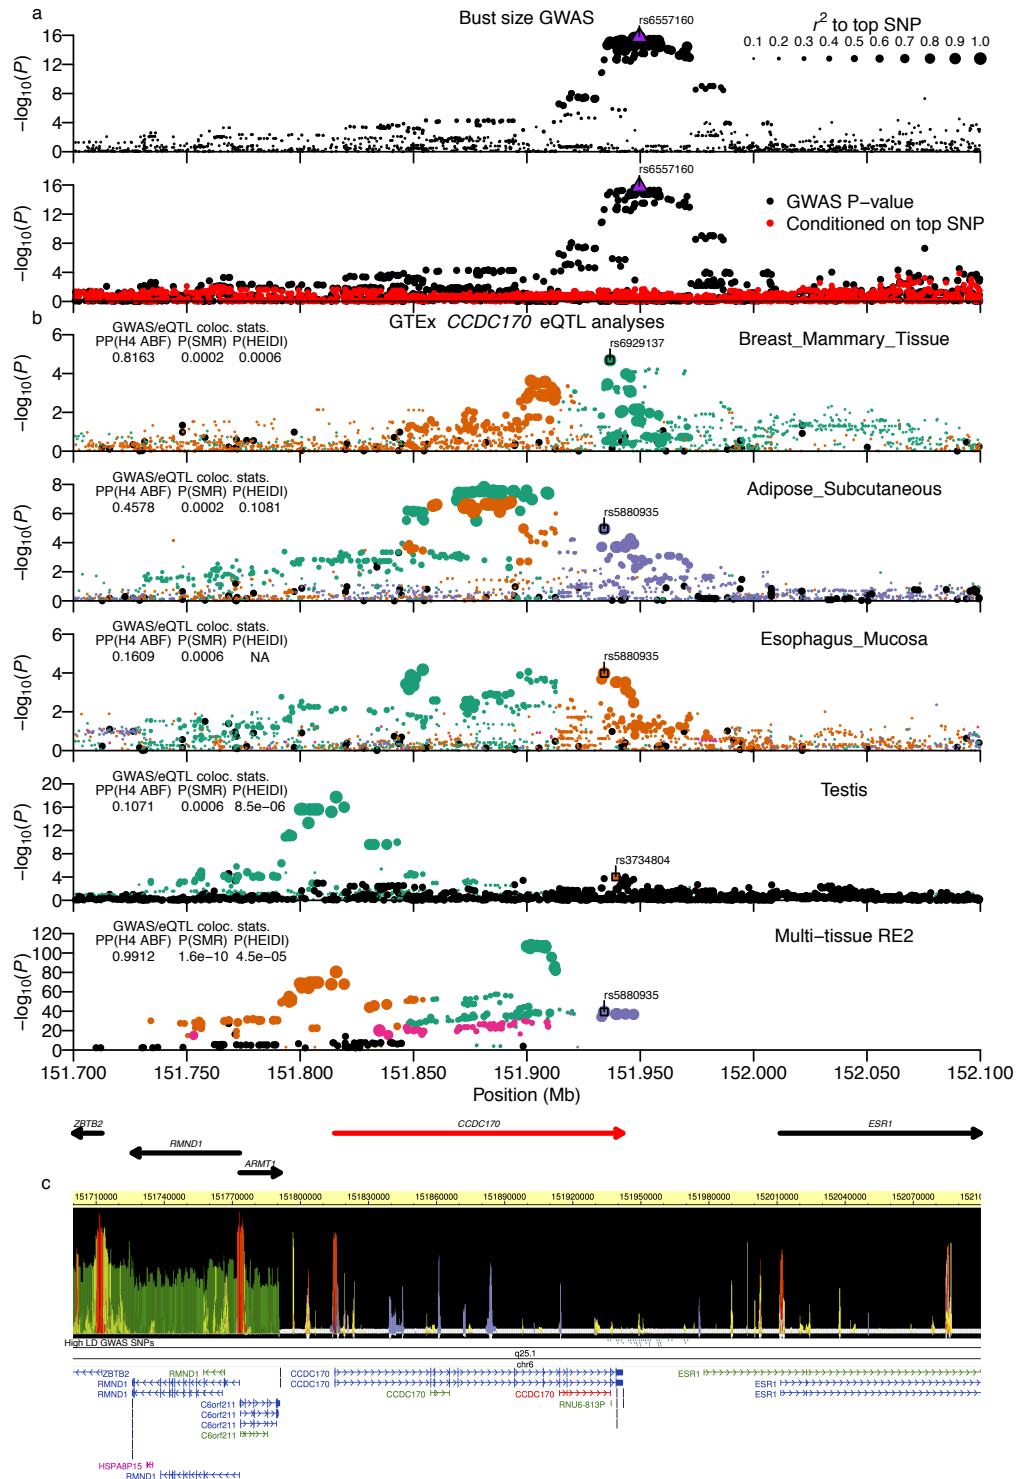

**Figure S4. Bust-size chr6:151.92-151.99 Mb (*CCDC170*) locus**

A common description of the regional-association/signal-colocalization plots is provided above. Panel (b) shows analysis of GTExPortal *CCDC170* eQTL data with the two upper panels showing single-tissue analyses for subcutaneous adipose and breast mammary tissue samples.



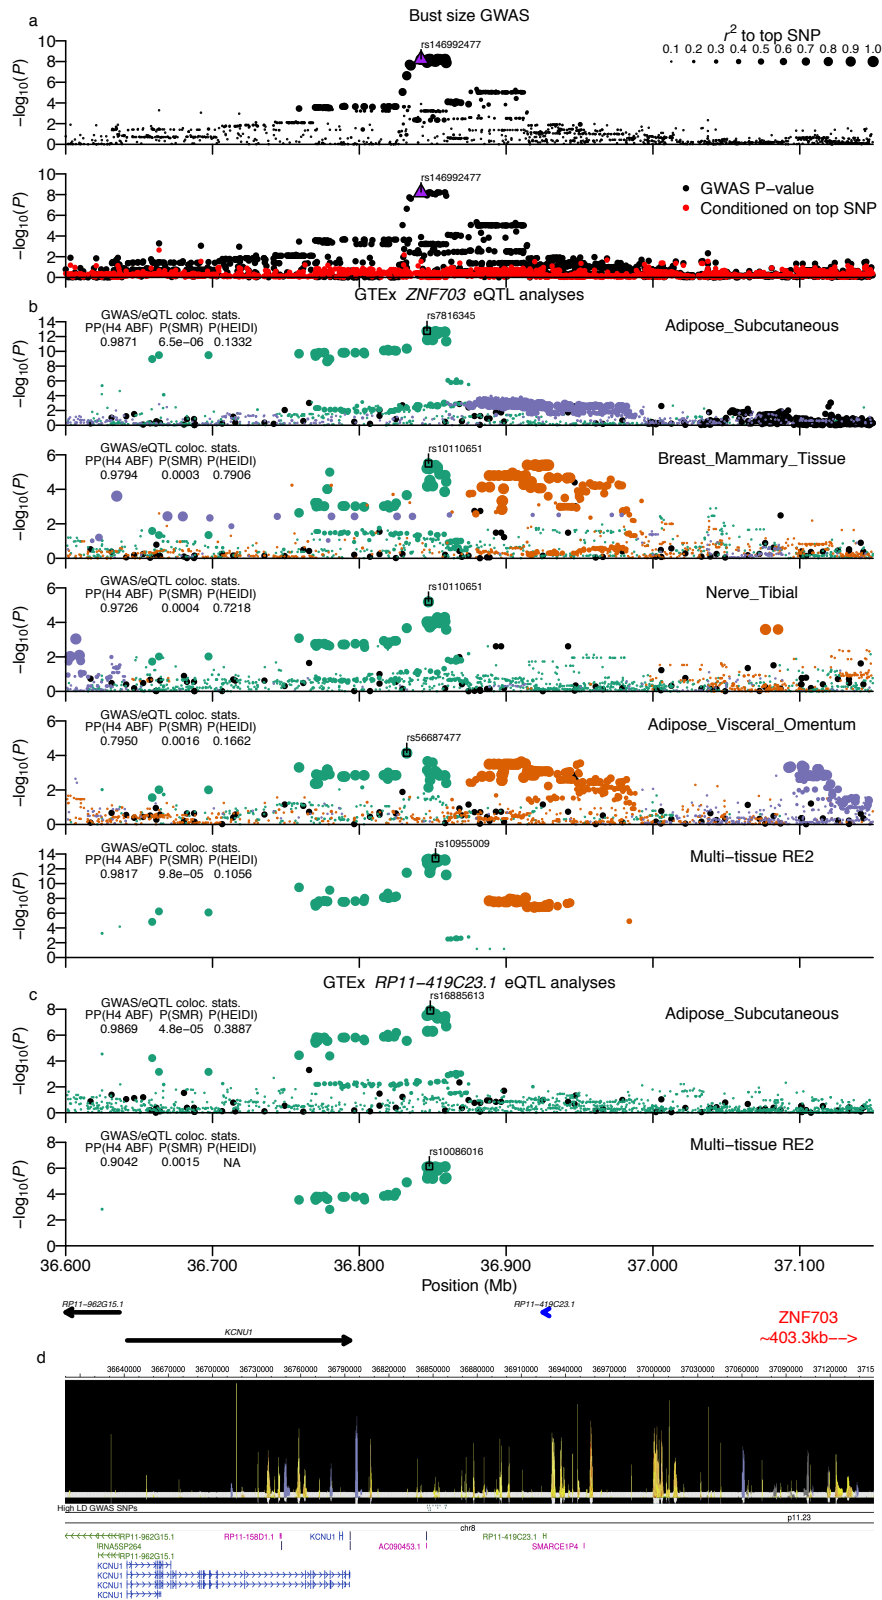

### Figure S5. Bust-size chr8:36.76-36.91 Mb (*KCNU1*/*ZNF703*) locus

A common description of the regional-association/signal-colocalization plots is provided above Figure S4. Analyses of GTExPortal single-tissue and multi-tissue eQTL data for *ZNF703* in Panel (b) and for ncRNA *RP11-419C23.13* in Panel (c). ABF colocalization analysis of multi-tissue data for both genes was run using Metasoft FE  $\beta$ -coefficients and standard errors as input. The gene model sub-panel highlights the two target eQTL genes in red and blue. All high LD GWAS variants shown in Panel (d) also had  $RSS > 0.8$  to top eQTL signal SNPs for each gene-tissue pair that is presented.

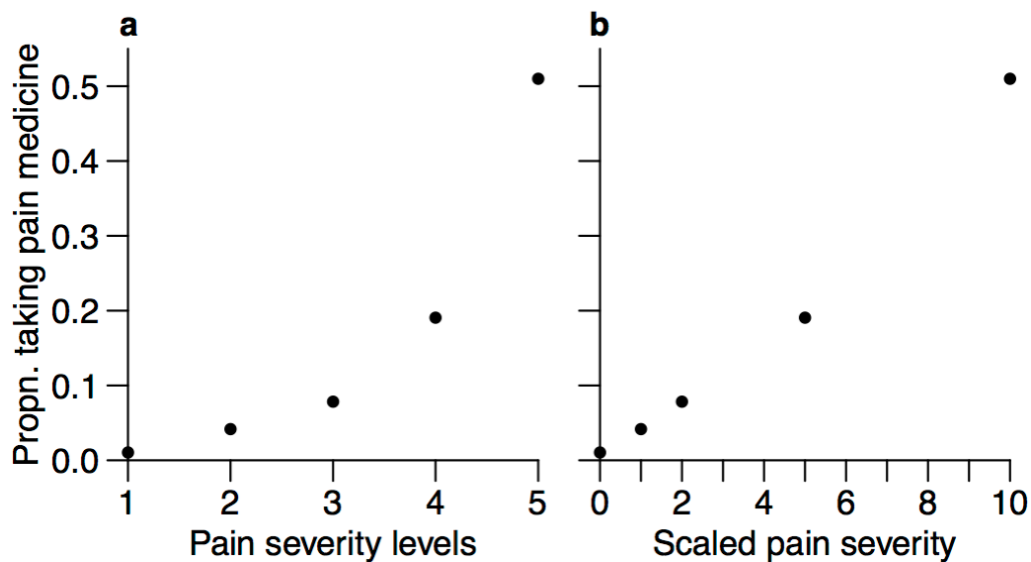

**Figure S6. Transformation of pain severity levels to 0-10 Numeric Rating Scale**

Dysmenorrhea was mapped from the original 1-5 integer values to points on the 0-10 Numeric Rating Scale for pain. Panels (a) and (b) show that the transformed values better represent a surrogate variable for pain severity, namely, the proportion of subjects in each level who take pain medicine. Panel (a) Untransformed pain severity levels versus proportion of subjects in each level taking pain medicine during menstruation. Panel (b) Transformed pain severity versus proportion of subjects in each level taking pain medicine during menstruation.

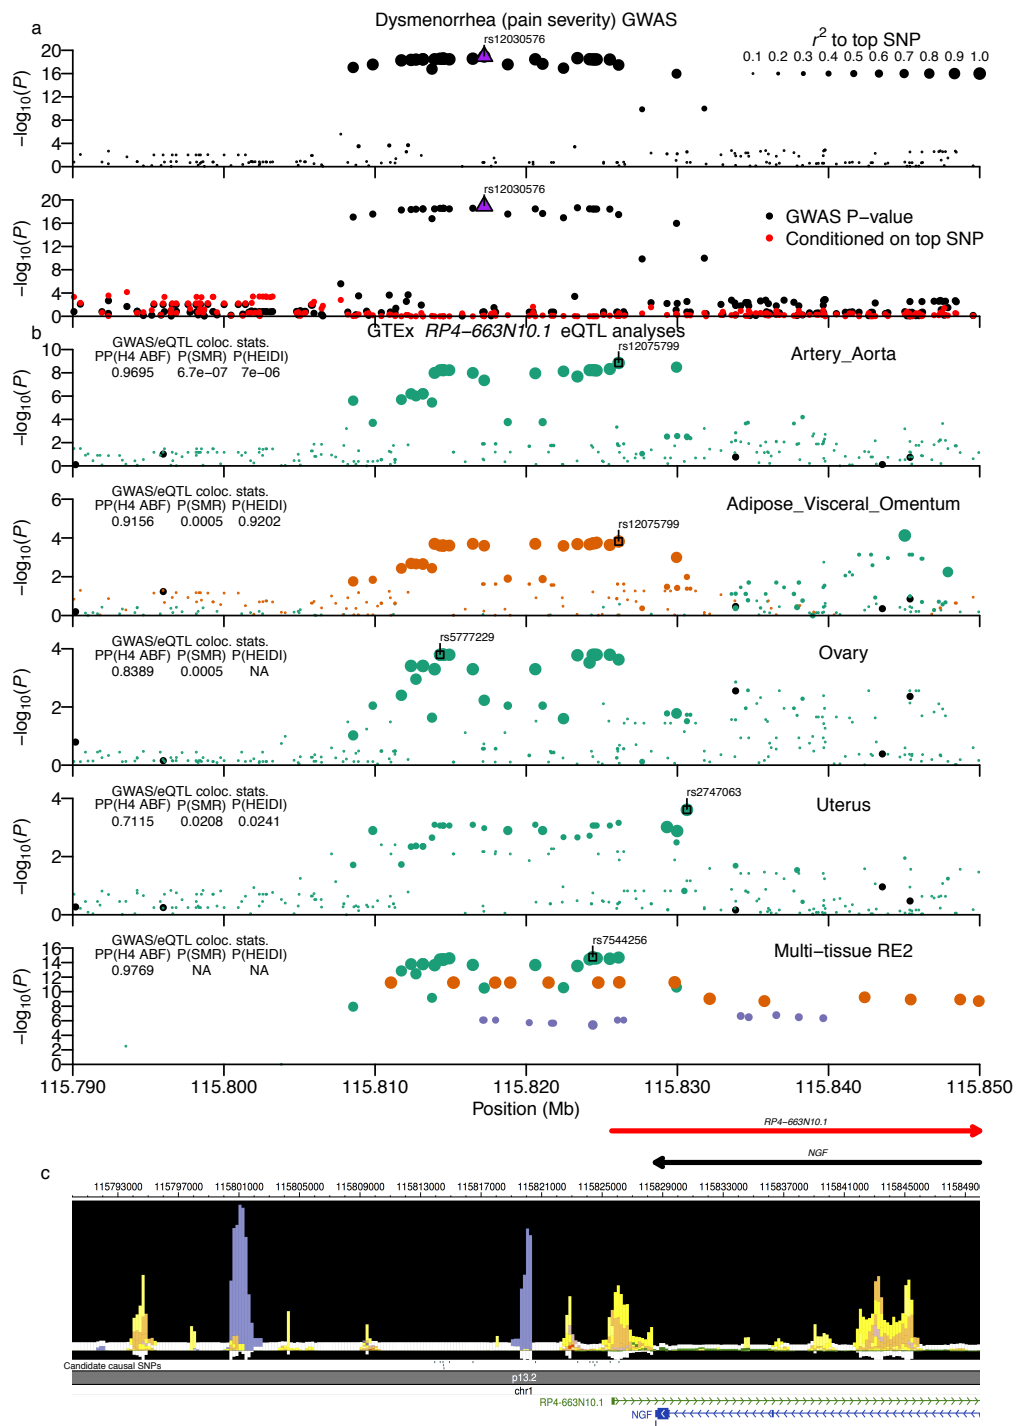

**Figure S7. Dysmenorrhea (pain severity) chr1:115.80-115.83 Mb (*NGF*) locus**

A common description of the regional-association/signal-colocalization plots is provided above Figure S4. Panel (b) shows analyses of GTExPortal multi-tissue and single-tissue eQTL data for lncRNA *RP4-663N10.1*. There were no *NGF* eQTLs that overlapped GWAS SNPs.

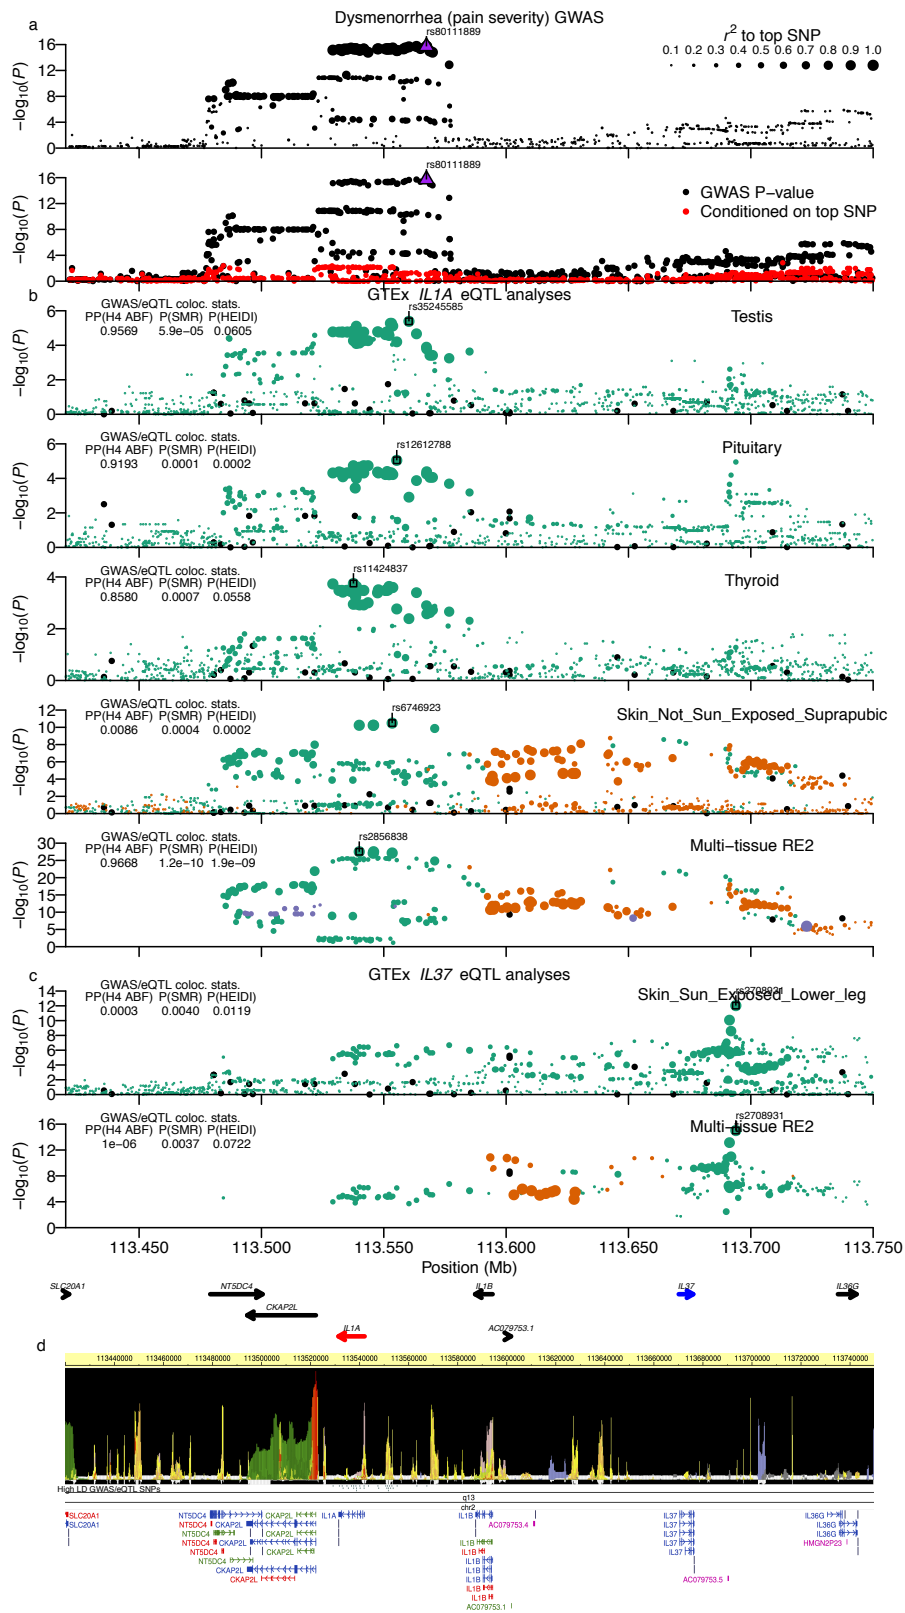

**Figure S8. Dysmenorrhea pain severity chr2:113.48-113.58Mb (*IL1* gene cluster) locus**

A common description of the regional-association/signal-colocalization plots is provided above Figure S4. Analyses for single-tissue and multi-tissue *IL1A* and *IL37* eQTL data are shown in Panel (b) and Panel (c), respectively.

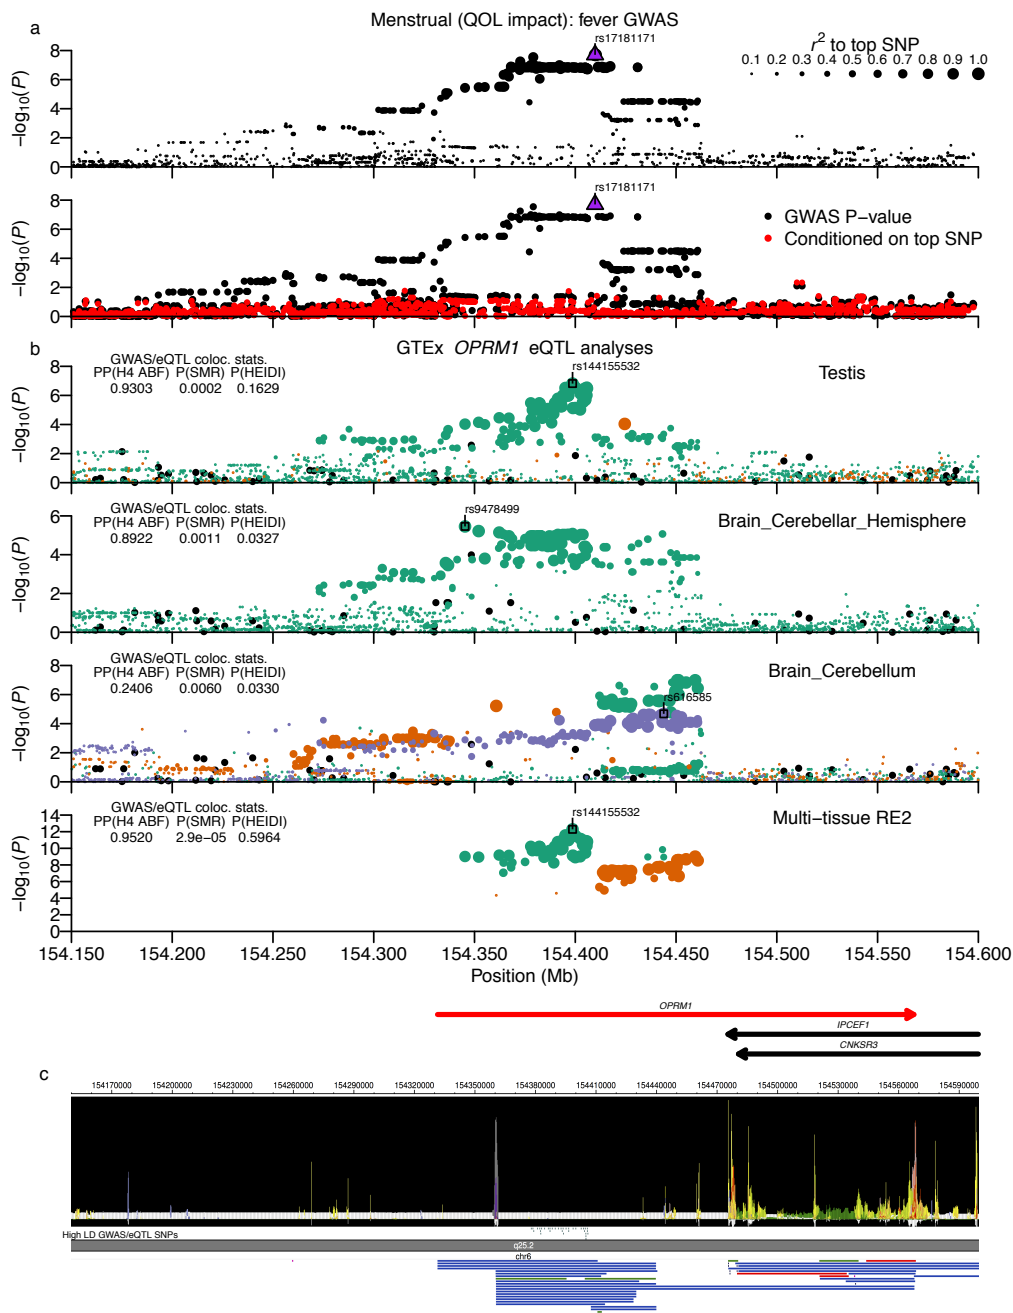

**Figure S9. Menstrual fever (QOL impact) chr6:154.33-154.46 Mb (*OPRM1*) locus**

A common description of the regional-association/signal-colocalization plots is provided above Figure S4. Panel (b) shows analyses of GTExPortal single-tissue and multi-tissue *OPRM1* eQTL data. The ABF colocalization method was run using  $\beta$ -coefficients and standard errors. Candidate causal SNPs shown in Panel (c) are SNPs with  $r^2_{equiv} > 0.8$  and  $RSS > 0.8$  to top eQTL signal SNPs for brain cerebellar hemisphere and testis tissue samples.
